# Supplementary material
Source: publisher figshare collection journal article supplement (https://acs.figshare.com/ndownloader/files/3788668)
Supplement: Supplementary file 1 [file 3788668]

## Supplemental Information

### Visible-light Photocatalytic Activity of S-doped $\alpha$ - $\text{Bi}_2\text{O}_3$

*Shiqi Jiang<sup>a</sup>, Liang Wang<sup>a</sup>, Weichang Hao<sup>a\*</sup>, Wenxian Li<sup>b</sup>, Huiju Xin<sup>a</sup>, Wenwen*

*Wang<sup>a\*</sup>, Tianmin Wang<sup>a</sup>*

<sup>a</sup> Center of Materials Physics and Chemistry, Beihang University, Beijing 100191, PR

China

<sup>b</sup> Solar Energy Technologies, School of Computing, Engineering and Mathematics,

University of Western Sydney, Penrith, New South Wales, 2751, Australia

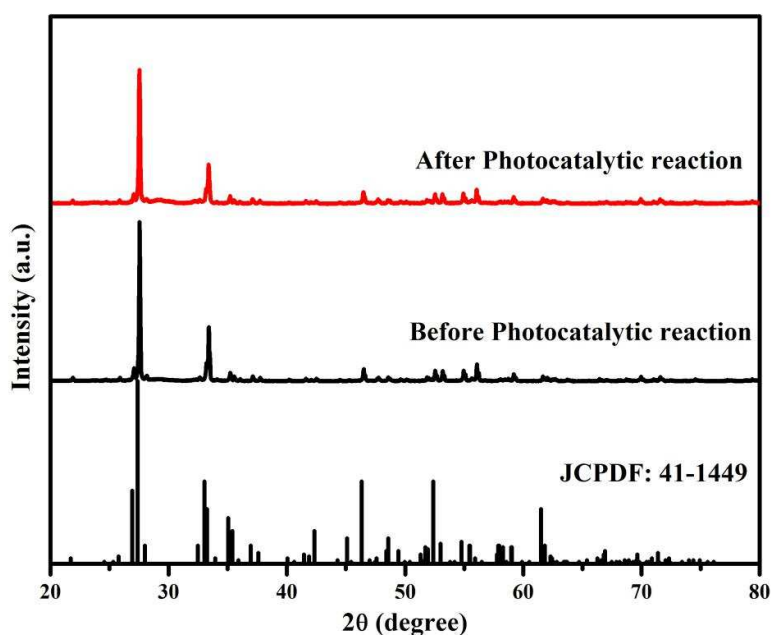

**Figure S1** The XRD patterns of  $\alpha$ - $\text{Bi}_2\text{O}_3$  S doped at 7 % before and after photocatalytic

reaction.

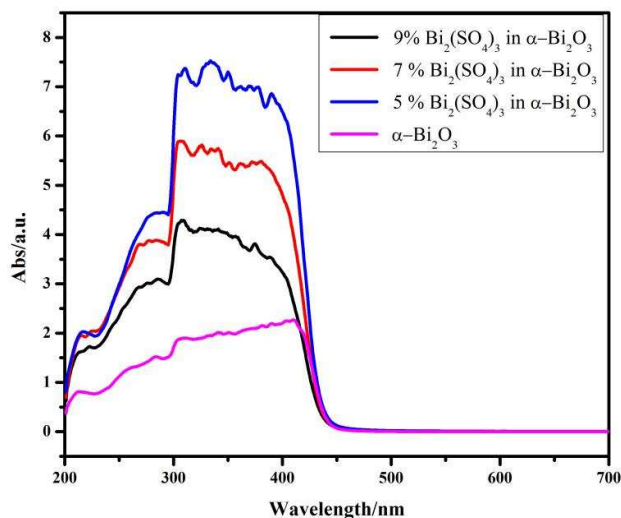

**Figure S2** UV-Vis absorption spectra of compounds mixed with 5%, 7%, 9%  $\text{Bi}_2(\text{SO}_4)_3$  and  $\alpha\text{-Bi}_2\text{O}_3$ .

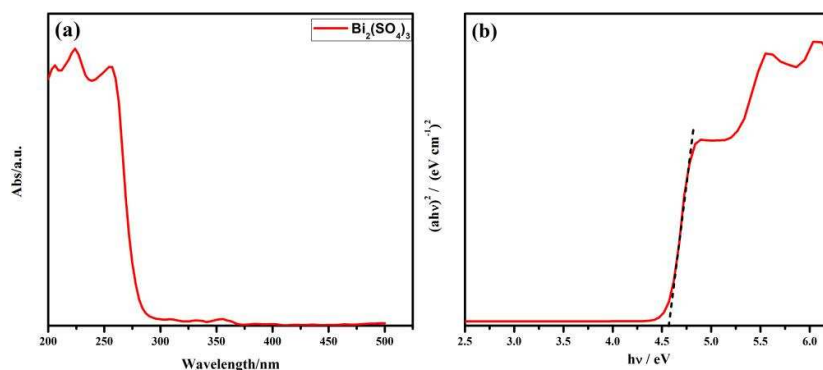

**Figure S3** (a) UV-Vis absorption spectra and (b) Tauc plot of  $\text{Bi}_2(\text{SO}_4)_3$ .

The band gap of  $\text{Bi}_2(\text{SO}_4)_3$  can be determined with the following Equation S1 below<sup>S1</sup>.

$$\alpha h\nu = A(h\nu - E_g)^{\frac{n}{2}} \quad (\text{S1})$$

The  $\alpha$ ,  $\nu$ ,  $E_g$ ,  $A$ , and  $n$  are the absorption coefficient, the incident light frequency, the band gap, a constant and an integer, respectively. The values of  $n$  and  $E_g$  were obtained as follows:

First, the approximate value of  $E_g$  was estimated through extrapolating the straight line to the wavelength axis (Fig. S2(a)), and then plotting  $\ln(\alpha h\nu)$  vs.  $\ln(h\nu - E_g)$  (inset of Fig. S2(a)). Thus, the slope of the straightest line near the band edge is the value of  $n$ .

Second, plot  $(\alpha h\nu)^{2/n}$  vs.  $h\nu$ , and then evaluate the band gap  $E_g$  (4.57 eV) by drawing an extension line to the  $h\nu$  axis intercept (Fig. S2(b)).

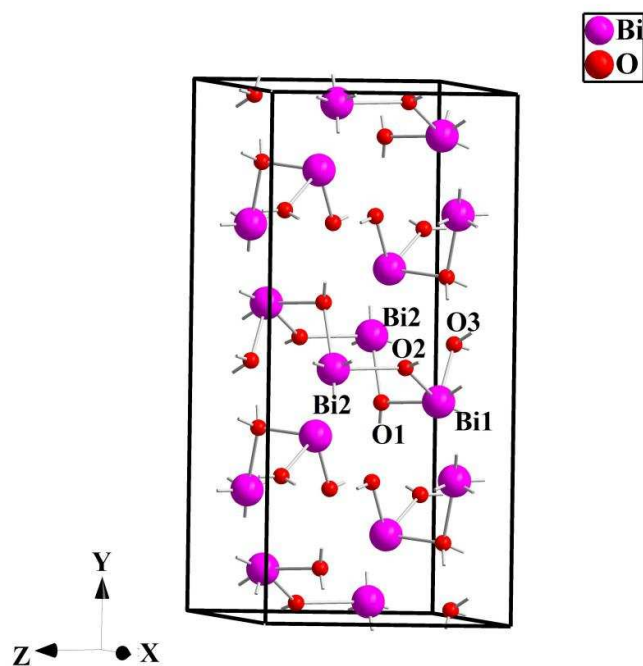

**Figure S4** The crystal structure of  $\alpha$ -Bi<sub>2</sub>O<sub>3</sub> with marked asymmetric Bi and O sites.

#### Refence

(S1) Butler, M. A. Photoelectrolysis and Physics Properties of the Semiconducting Electrode WO<sub>2</sub>. *J. Appl. Phys.* **1977**, 48, 1914-1920.
